# Supplementary material for: A systematic review of clinical practice guidelines on the use of low molecular weight heparin and fondaparinux for the treatment and prevention of venous thromboembolism: Implications for research and policy decision-making
Source: PubMed Central journal article supplement (PMC6226206; doi:10.1371/journal.pone.0207410), 2018-11-09
Supplement: pone.0207410.s006.pdf [file pone.0207410.s006.pdf]

**S2 Table. General characteristics of included clinical practice guidelines.**

| Title (Publication Year)                                                                                                                                                                                         | Affiliated Organization(s) | Location of Origin      | Evidence appraisal system                                                           | Indications addressed |
|------------------------------------------------------------------------------------------------------------------------------------------------------------------------------------------------------------------|----------------------------|-------------------------|-------------------------------------------------------------------------------------|-----------------------|
| VTE, thrombophilia, antithrombotic therapy, and pregnancy: Antithrombotic Therapy and Prevention of Thrombosis, 9th ed: American College of Chest Physicians Evidence-Based Clinical Practice Guidelines [8]     | ACCP                       | United States           | ACCP modified approach to GRADE                                                     | T5                    |
| Clinical challenges in patients with cancer-associated thrombosis: Canadian expert consensus recommendations [37]                                                                                                | Not reported               | Canada                  | Not reported                                                                        | T2, T4, P4            |
| Venous thromboembolism and antithrombotic therapy in pregnancy [16]                                                                                                                                              | SOGC                       | Canada                  | Adapted from the classification of recommendations criteria described in the CTFPHC | T5                    |
| International clinical practice guidelines for the treatment and prophylaxis of thrombosis associated with central venous catheters in patients with cancer [1]                                                  | GFTC; AMC; UMCG; INCa      | France, The Netherlands | GRADE                                                                               | T2, P4                |
| Perioperative management of antithrombotic therapy. Antithrombotic therapy and prevention of thrombosis, 9th ed: American College of Chest Physicians evidence-based clinical practice guidelines [9]            | ACCP                       | United States           | ACCP modified approach to GRADE                                                     | P5                    |
| Canadian consensus recommendations on the management of venous thromboembolism in patients with cancer. Part 1: prophylaxis [25]                                                                                 | Not reported               | Canada                  | CEBM Levels of Evidence (March 2009)                                                | P3, P4                |
| Canadian consensus recommendations on the management of venous thromboembolism in patients with cancer. Part 2: treatment [23]                                                                                   | Not reported               | Canada                  | CEBM Levels of Evidence (March 2009)                                                | T2, P4                |
| Prevention of VTE in orthopedic surgery patients: Antithrombotic Therapy and Prevention of Thrombosis, 9th ed: American College of Chest Physicians Evidence-Based Clinical Practice Guidelines [10]             | ACCP                       | United States           | ACCP modified approach to GRADE                                                     | P2                    |
| International clinical practice guidelines for the treatment and prophylaxis of venous thromboembolism in patients with cancer [3]                                                                               | GFTC; AMC; UMCG; INCa      | France, The Netherlands | GRADE                                                                               | T2, T5, P3, P4        |
| Prevention of VTE in nonorthopedic surgical patients: Antithrombotic Therapy and Prevention of Thrombosis, 9th ed: American College of Chest Physicians Evidence-Based Clinical Practice Guidelines [11]         | ACCP                       | United States           | ACCP modified approach to GRADE                                                     | P3                    |
| Venous thromboembolism (VTE) [35]                                                                                                                                                                                | UMHS                       | United States           | Not reported                                                                        | T1, T2, T3, T5        |
| Evidence-based management of anticoagulant therapy: Antithrombotic Therapy and Prevention of Thrombosis, 9th ed: American College of Chest Physicians Evidence-Based Clinical Practice Guidelines [12]           | ACCP                       | United States           | ACCP modified approach to GRADE                                                     | T1                    |
| Practice bulletin no. 123: thromboembolism in pregnancy [26]                                                                                                                                                     | ACOG                       | United States           | ACCP modified approach to GRADE                                                     | T5                    |
| Prevention of VTE in nonsurgical patients: Antithrombotic Therapy and Prevention of Thrombosis, 9th ed: American College of Chest Physicians Evidence-Based Clinical Practice Guidelines [13]                    | ACCP                       | United States           | ACCP modified approach to GRADE                                                     | P4                    |
| Antithrombotic therapy for VTE disease: Antithrombotic Therapy and Prevention of Thrombosis, 9th ed: American College of Chest Physicians Evidence-Based Clinical Practice Guidelines [14]                       | ACCP                       | United States           | ACCP modified approach to GRADE                                                     | T1, T2                |
| Guidelines on oral anticoagulation with warfarin - fourth edition [4]                                                                                                                                            | BSH                        | United Kingdom          | GRADE                                                                               | T1, T2, P5            |
| Treatment and prevention of heparin-induced thrombocytopenia: Antithrombotic Therapy and Prevention of Thrombosis, 9th ed: American College of Chest Physicians Evidence-Based Clinical Practice Guidelines [15] | ACCP                       | United States           | ACCP modified approach to GRADE                                                     | T1, P3                |

| Title (Publication Year)                                                                                                                                                                                        | Affiliated Organization(s)                            | Location of Origin                             | Evidence appraisal system                                                                      | Indications addressed |
|-----------------------------------------------------------------------------------------------------------------------------------------------------------------------------------------------------------------|-------------------------------------------------------|------------------------------------------------|------------------------------------------------------------------------------------------------|-----------------------|
| Diagnosis and management of iliofemoral deep vein thrombosis: clinical practice guideline Interdisciplinary Expert Panel on Iliofemoral Deep Vein Thrombosis [18]                                               | CIRA                                                  | Canada                                         | American Heart Association clinical practice methodology and GRADE system                      | T1,T2                 |
| Venous thromboembolism prophylaxis and treatment in patients with cancer: american society of clinical oncology clinical practice guideline update 2014 [36]                                                    | ASCO                                                  | United States                                  | Not reported                                                                                   | T2,P3,P4              |
| Management of venous thromboembolism (VTE) in cancer patients: ESMO clinical practice guidelines [33]                                                                                                           | ESMO                                                  | Europe                                         | Adapted from various approaches used by: AHRQ, the Cochrane Collaboration, SIGN; USPSTF; GRADE | T2,P3,P4              |
| Prevention and treatment of venous thromboembolism: International consensus statement (Guidelines according to scientific evidence) [38]                                                                        | CDER; EVF; NATF; IUA; and UIP                         | Czech Republic, France, North America, and the | Not reported                                                                                   | T1,T2,T5,P2 ,P3,P5    |
| Antithrombotics: indications and management [43]                                                                                                                                                                | HEI, Scottish Health Council, SHTG, and SIGN, and SMC | United Kingdom                                 | GRADE                                                                                          | T5,P3                 |
| Prevention of venous thromboembolism in patients with cancer: Guidelines of the Italian Society for Haemostasis and Thrombosis (SISET)1 [28]                                                                    | SISET                                                 | Italy                                          | Modified from: SIGN 50 Grading System and NICE system                                          | P3,P4                 |
| Venous thromboembolic disease: Clinical practice guidelines in oncology [31]                                                                                                                                    | NCCN                                                  | United States                                  | NCCN Categories of Evidence and Consensus                                                      | T1,T2,P3,P4           |
| Venous thromboembolism prophylaxis in cancer patients - guidelines focus on surgical patients [42]                                                                                                              | Polish Society of Phlebology and the PTCN             | Poland                                         | GRADE                                                                                          | P3                    |
| Guideline on aspects of cancer-related venous thrombosis [5]                                                                                                                                                    | BCSH                                                  | United Kingdom                                 | GRADE                                                                                          | T2,P3,P4              |
| Antithrombotic and thrombolytic therapy for valvular disease: Antithrombotic Therapy and Prevention of Thrombosis, 9th ed: American College of Chest Physicians Evidence-Based Clinical Practice Guidelines [6] | ACCP                                                  | United States                                  | ACCP modified approach to GRADE                                                                | T1,P5                 |

**Indication codes:** **T1:** Treatment of DVT in patients without cancer; **T2:** Treatment of symptomatic, acute, VTE in patients with cancer; **T3:** Treatment of DVT in patients in whom treatment with warfarin is either not tolerated or contraindicated; **T4:** Treatment of DVT in patients who fail treatment with warfarin; **T5:** Treatment of DVT in pregnant and/or lactating women; **P1:** Post-operative prophylaxis of DVT in patients undergoing hip or knee surgery and cannot use warfarin; **P2:** Post-operative prophylaxis of VTE in patients undergoing surgery of the lower limbs; **P3:** Prevention of VTE in patients undergoing non-orthopedic surgery; **P4:** Prevention of VTE in patients with cancer; **P5:** Peri-operative bridging for patients who require long-term warfarin and must discontinue due to surgery.

**Abbreviations:** American College of Chest Physicians (**ACCP**); American College of Obstetricians and Gynecologists (**ACOG**); Agency for Healthcare Research and Quality (**AHRQ**); Academic Medical Center (**AMC**); The American Society of Clinical Oncology (**ASCO**); British Committee for Standards in Haematology (**BCSH**); British Society for Haematology (**BSH**); Cardiovascular Disease Educational and Research Trust (**CDER**); University of Oxford Centre for Evidence-Based Medicine (**CEBM**); Canadian Interventional Radiology Association (**CIRA**); Canadian Task Force on Preventive Health Care (**CTFPHC**); European Society for Medical Oncology (**ESMO**); European Venous Forum (**EVF**); Groupe Francophone Thrombose et Cancer (**GFTC**); Recommendations Assessment Development and Evaluation (**GRADE**); The Healthcare Environmental Inspectorate (**HEI**); French Institute of Cancer (**INCa**); International Union of Angiology (**IUA**); North American Thrombosis Forum (**NATF**); National Comprehensive Cancer Network (**NCCN**); National Institute for Clinical Excellence (**NICE**); Polish Society for Vascular Surgery (**PTCN**); Scottish Health Technologies Group (**SHTG**); Scottish Intercollegiate Guidelines Network (**SIGN**); Italian Society for Haemostasis and Thrombosis (**SISET**); Scottish Medicine Consortium (**SMC**); The Society of Obstetricians and Gynaecologists (**SOGC**); The Union Internationale du Phlebologie (**UIP**); University Medical Center Groningen (**UMCG**); University of Michigan Health System (**UMHS**); United States Preventive Services Task Force (**USPSTF**)

**S3 Table References**

1. Bates SM, Greer IA, Middeldorp S, Veenstra DL, Prabulos AM, Vandvik PO, et al. VTE, thrombophilia, antithrombotic therapy, and pregnancy: Antithrombotic Therapy and Prevention of Thrombosis, 9th ed: American College of Chest Physicians Evidence-Based Clinical Practice Guidelines. *Chest*. 2012;141:e691S-e736S.
2. Carrier M, Lazo-Langer A, Shivakumar S, Tagalakis V, Gross P, Blais N, et al. Clinical challenges in patients with cancer-associated thrombosis: Canadian expert consensus recommendations. *Curr Oncol*. 2015;22(1):49-59.
3. Chan W, Rey E, Kent N, Group' ViPGW, Chan W, Kent N, et al. Venous thromboembolism and antithrombotic therapy in pregnancy. *J Obstet Gynaecol Can*. 2014;36(6):527-53.
4. Debourdeau P, Farge D, Beckers M, Baglin C, Bauersachs RM, Brenner B, et al. International clinical practice guidelines for the treatment and prophylaxis of thrombosis associated with central venous catheters in patients with cancer. *Journal of thrombosis and haemostasis : JTH*. 2013;11:71-80.
5. Douketis J, Spyropoulos A, Spencer F, Mayr M, Jaffer A, Eckman M, et al. Perioperative management of antithrombotic therapy. Antithrombotic therapy and prevention of thrombosis, 9th ed: American College of Chest Physicians evidence-based clinical practice guidelines. *Chest*. 2012;141(2 Suppl):e326S-e50S.
6. Easaw JC, Shea-Budgell MA, Wu CM, Czaykowski PM, Kassis J, Kuehl B, et al. Canadian consensus recommendations on the management of venous thromboembolism in patients with cancer. Part 1: prophylaxis. *Current Oncology*. 2015;22:133-43.
7. Easaw J, Shea-Budgell M, Wu C, Czaykowski P, Kassis J, Kuehl B, et al. Canadian consensus recommendations on the management of venous thromboembolism in patients with cancer. Part 2: treatment. *Current Oncology*. 2015;22:144-55.
8. Falck-Ytter Y, Francis CW, Johanson NA, Curley C, Dahl OE, Schulman S, et al. Prevention of VTE in orthopedic surgery patients: Antithrombotic Therapy and Prevention of Thrombosis, 9th ed: American College of Chest Physicians Evidence-Based Clinical Practice Guidelines. *Chest*. 2012;141:e278S-e325S.
9. Farge D, Bounameaux H, Brenner B, Cajfinger F, Debourdeau P, Khorana AA, et al. International clinical practice guidelines including guidance for direct oral anticoagulants in the treatment and prophylaxis of venous thromboembolism in patients with cancer. *The Lancet Oncology*. 2016;17(10):e452-e66.
10. Gould MK, Garcia DA, Wren SM, Karanickolas PJ, Arcelus JI, Heit JA, et al. Prevention of VTE in nonorthopedic surgical patients: Antithrombotic Therapy and Prevention of Thrombosis, 9th ed: American College of Chest Physicians Evidence-Based Clinical Practice Guidelines. *Chest*. 2012;141:e227S-e77S.
11. Venous Thromboembolism Guideline Team. Venous thromboembolism (VTE): Guidelines for Clinical Care Ambulatory. Ann Arbor (MI): University of Michigan, 2014 May. Report No.
12. Holbrook A, Schulman S, Witt DM, Vandvik PO, Fish J, Kovacs MJ, et al. Evidence-based management of anticoagulant therapy: Antithrombotic Therapy and Prevention of Thrombosis, 9th ed: American College of Chest Physicians Evidence-Based Clinical Practice Guidelines. *Chest*. 2012;141:e152S-e84S.
13. James A, Committee on Practice Bulletins- Obstetrics. Practice bulletin no. 123: thromboembolism in pregnancy. *ObstetGynecol*. 2011;118(3):718-29.
14. Kahn SR, Lim W, Dunn AS, Cushman M, Dentali F, Akl EA, et al. Prevention of VTE in nonsurgical patients: Antithrombotic Therapy and Prevention of Thrombosis, 9th ed: American College of Chest Physicians Evidence-Based Clinical Practice Guidelines. *Chest*. 2012;141:e195S-e226S.
15. Kearon C, Akl EA, Ornelas J, Blaivas A, Jimenez D, Bounameaux H, et al. Antithrombotic therapy for VTE disease: CHEST guideline and expert panel report. *Chest*. 2016;149(2):315-52.
16. Keeling D, Baglin T, Tait C, Watson H, Perry D, Baglin C, et al. Guidelines on oral anticoagulation with warfarin - fourth edition. *Br J Haematol*. 2011;154(3):311-24.
17. Linkins LA, Dans AL, Moores LK, Bona R, Davidson BL, Schulman S, et al. Treatment and prevention of heparin-induced thrombocytopenia: Antithrombotic Therapy and Prevention of Thrombosis, 9th ed: American College of Chest Physicians Evidence-Based Clinical Practice Guidelines. *Chest*. 2012;141:e495S-e530S.

18. Liu D, Peterson E, Dooner J, Baerlocher M, Zypchen L, Gagnon J, et al. Diagnosis and management of iliofemoral deep vein thrombosis: clinical practice guideline CMAJ. 2015;187(17):1288-96.
19. Lyman GH, Khorana AA, Kuderer NM, Lee AY, Arcelus JI, Balaban EP, et al. Venous thromboembolism prophylaxis and treatment in patients with cancer: American Society of Clinical Oncology clinical practice guideline update. J Clin Oncol. 2013;31:2189-204.
20. Mandala M, Falanga A, Roila F, ESMO Guidelines Working Group. Management of venous thromboembolism (VTE) in cancer patients: ESMO Clinical Practice Guidelines. Ann Oncol. 2011;22(Suppl6):vi85-vi92.
21. Cardiovascular Disease Educational and Research Trust, European Venous Forum, North American Thrombosis Forum, International Union of Angiology, Union Internationale du Phlebologie. Prevention and treatment of venous thromboembolism: international consensus statement (guidelines according to scientific evidence). Clin Appl Thromb Hemost. 2013;19(2):116-225.
22. Antithrombotics: indications and management. Edinburgh, Scotland: Scottish Intercollegiate Guidelines Network (SIGN). 2013.
23. Siragusa S, Armani U, Carpenedo M, Falanga A, Fulfaro F, Imberti D, et al. Prevention of venous thromboembolism in patients with cancer: Guidelines of the Italian Society for Haemostasis and Thrombosis (SISET). Thrombosis Research. 2012;129:e171-e6.
24. Streiff M, Holstrom B, Ashrani A, Brockenstedt P, Chesney C, Eby C, et al. Cancer-Associated Venous Thromboembolic Disease, Version 1.2015. J Natl Compr Canc Netw. 2015;13(9):1079-95.
25. Urbaneck T, Krasinski Z, Kostrubiec M, Sydor W, Wysocki P, Antoniewicz A, et al. Venous thromboembolism prophylaxis in cancer patients - guidelines focus on surgical patients. Acta Angiologica. 2016;22(3):71-102.
26. Watson HGK. Guideline on aspects of cancer-related venous thrombosis. British Journal of Haematology. 2015;170:640-8.
27. Whitlock RP, Sun JC, Frenes SE, Rubens FD, Teoh KH, Physicians American College of C. Antithrombotic and thrombolytic therapy for valvular disease: Antithrombotic Therapy and Prevention of Thrombosis, 9th ed: American College of Chest Physicians Evidence-Based Clinical Practice Guidelines. Chest. 2012;141:e576S-e600S.
