# Supplementary material for: A systematic review of clinical practice guidelines on the use of low molecular weight heparin and fondaparinux for the treatment and prevention of venous thromboembolism: Implications for research and policy decision-making
Source: PubMed Central journal article supplement (PMC6226206; doi:10.1371/journal.pone.0207410), 2018-11-09
Supplement: pone.0207410.s008.pdf [file pone.0207410.s008.pdf]

**S4 Table. Number of recommendations, the quality of CPGs reporting them, and the frequency with which each drug class and individual LMWH agents were discussed, by indication.**

| Indication (# RECs)                                                                     | # RECs by evidence level                                                   | # times LMWH and FDP mentioned (%)                                                                               | CPG quality # (%)                               |
|-----------------------------------------------------------------------------------------|----------------------------------------------------------------------------|------------------------------------------------------------------------------------------------------------------|-------------------------------------------------|
| <b>Treatment of:</b>                                                                    |                                                                            |                                                                                                                  |                                                 |
| Symptomatic, acute, VTE in cancer patients (k=40)                                       | Level A: 13 (33)<br>Level B: 6 (15)<br>Level C: 12 (30)<br>Level D: 9 (23) | LMWH: 36 (73)<br>dalteparin: 3 (6)<br>enoxaparin: 2 (4)<br>tinzaparin: 4 (8)<br>FDP: 4 (8)                       | High: 4 (33)<br>Moderate: 5 (42)<br>Low: 3 (25) |
| DVT in pregnant and/or lactating females (k= 19)                                        | Level A: 3 (16)<br>Level B: 9 (47)<br>Level C: 4 (21)<br>Level D: 3 (16)   | LMWH: 17 (89)<br>FDP: 2 (11)                                                                                     | High: 2 (29)<br>Moderate: 1 (14)<br>Low: 3 (43) |
| DVT in non-cancer patients (k=15)                                                       | Level A: 3 (20)<br>Level B: 5 (33)<br>Level C: 7 (47)<br>Level D: 0        | LMWH: 13 (72)<br>FDP: 5 (28)                                                                                     | High: 4 (57)<br>Moderate: 2 (29)<br>Low: 1 (14) |
| DVT in patients who failed treatment with warfarin (k=6)                                | Level A: 1 (17)<br>Level B: 0<br>Level C: 5 (83)<br>Level D: 0             | LMWH: 6 (67)<br>FDP: 3 (33)                                                                                      | High: 2 (50)<br>Moderate: 2 (50)<br>Low: 0      |
| DVT in patients who cannot tolerate warfarin or it is contraindicated (k=1)             | Level A: 0<br>Level B: 1 (100)<br>Level C: 0<br>Level D: 0                 | LMWH: 1 (100)<br>FDP: 0                                                                                          | High: 0<br>Moderate: 0<br>Low: 1 (100)          |
| <b>Prevention of:</b>                                                                   |                                                                            |                                                                                                                  |                                                 |
| VTE for patients undergoing non-orthopedic surgery (k=48)                               | Level A: 20 (42)<br>Level B: 19 (40)<br>Level C: 9 (19)<br>Level D: 0      | LMWH: 46 (77)<br>dalteparin: 1 (2)<br>enoxaparin: 1 (2)<br>bevimarin: 1 (2)<br>FDP: 11 (18)                      | High: 5 (63)<br>Moderate: 1 (13)<br>Low: 2 (25) |
| VTE in cancer patients (k=19)                                                           | Level A: 4 (21)<br>Level B: 9 (47)<br>Level C: 5 (26)<br>Level D: 1 (5)    | LMWH: 17 (68)<br>dalteparin: 2 (8)<br>enoxaparin: 3 (12)<br>tinzaparin: 1 (4)<br>nadroparin: 1 (4)<br>FDP: 1 (4) | High: 3 (33)<br>Moderate: 3 (33)<br>Low: 3 (33) |
| Post-operative VTE for patients undergoing orthopedic surgery of the lower limbs (k=12) | Level A: 5 (42)<br>Level B: 7 (58)<br>Level C: 0<br>Level D: 0             | LMWH: 11 (58)<br>FDP: 8 (42)                                                                                     | High: 1 (50)<br>Moderate: 1 (50)<br>Low: 0      |
| <b>Peri-operative bridging for:</b>                                                     |                                                                            |                                                                                                                  |                                                 |
| Patients who require long-term warfarin and must discontinue due to surgery (k=8)       | Level A: 4 (50)<br>Level B: 4 (50)<br>C: 0<br>D: 0                         | LMWH: 8 (100)<br>FDP: 0                                                                                          | High: 2 (50)<br>Moderate: 1 (25)<br>Low: 1 (25) |

**Abbreviations:** RECs: recommendations; CPG= clinical practice guideline, LMWH= low molecular weight heparin, FDP= fondaparinux  
Evidence level A: high-quality evidence; B: moderate-quality evidence; C: low quality evidence; D: expert opinion/consensus

NB: We did not identify any recommendations for the prevention of post-operative DVT in patients undergoing hip or knee surgery and cannot use warfarin
